# Supplementary material
Source: PubMed Central journal article supplement (PMC2753688)
Supplement: NIHMS128779-supplement-01.pdf [file NIHMS128779-supplement-01.pdf]

## SUPPLEMENTARY MATERIAL

Identification and characterization of a novel 5 bp deletion in a putative insulin response element in the lipoprotein lipase gene, *by* L-X Yang, H. Razzaghi, J.E. Hokanson, M.I. Kamboh.

**Supplementary Fig. 1.** pGEM-4Z Vector Cloning Strategy. **a)**: Cloning sites in the pGEM-4Z vector. **b)**: Fragments of the LPL promoter (1537 bp) and LPL cDNA (3.6 kb). **c)**: Cloning of LPL promoter and LPL cDNA in the pGEM-4Z vector. **d)**: The pGEM-4Z vector containing the Tag (tgatgatga) sequence before the stop codon (TGA). **e)**: pGEM-4Z vectors containing LPL exon 10 wild type (WT), 5 bp deletion (Mut1) and deleted 19 bp IRE sequence (Mut2).

**Supplementary Fig. 2.** The sequence of the insulin response element (IRE) in the APOC3 gene (top) was used to find IRE in ten species. Three core consensus sequences labeled I, II, III, within a 19 bp stretch (positions 9-27 in the APOC3 gene). Following are the computed *P*-values for the probability of a nucleotide match at a specific position on the table, given *N* = 10 (the number of species) and *P* = 0.25 (chance of match for A, C, G, or T). *P*-value of greater than 0.01 was set as a minimum for scoring. Therefore, the number of matches must be greater than 5 in order to be counted in the consensus sequence.

| Number of Matches | Probability   | P-value                                 |
|-------------------|---------------|-----------------------------------------|
| 0                 | 0.0563        | 0.9347                                  |
| 1                 | 0.2440        | 0.7560                                  |
| 2                 | 0.5256        | 0.4744                                  |
| 3                 | 0.7759        | 0.2241                                  |
| 4                 | 0.9219        | 0.0781                                  |
| 5                 | 0.9803        | 0.0197                                  |
| <b>6</b>          | <b>0.9965</b> | <b>0.0035</b>                           |
| <b>7</b>          | <b>0.9996</b> | <b>0.0004</b>                           |
| <b>8</b>          | <b>0.9999</b> | <b><math>2.96 \times 10^{-5}</math></b> |
| <b>9</b>          | <b>0.9999</b> | <b><math>9.54 \times 10^{-7}</math></b> |
| 10                | 1             | <0.0001                                 |

# pGEM-4Z Vector Cloning Strategy

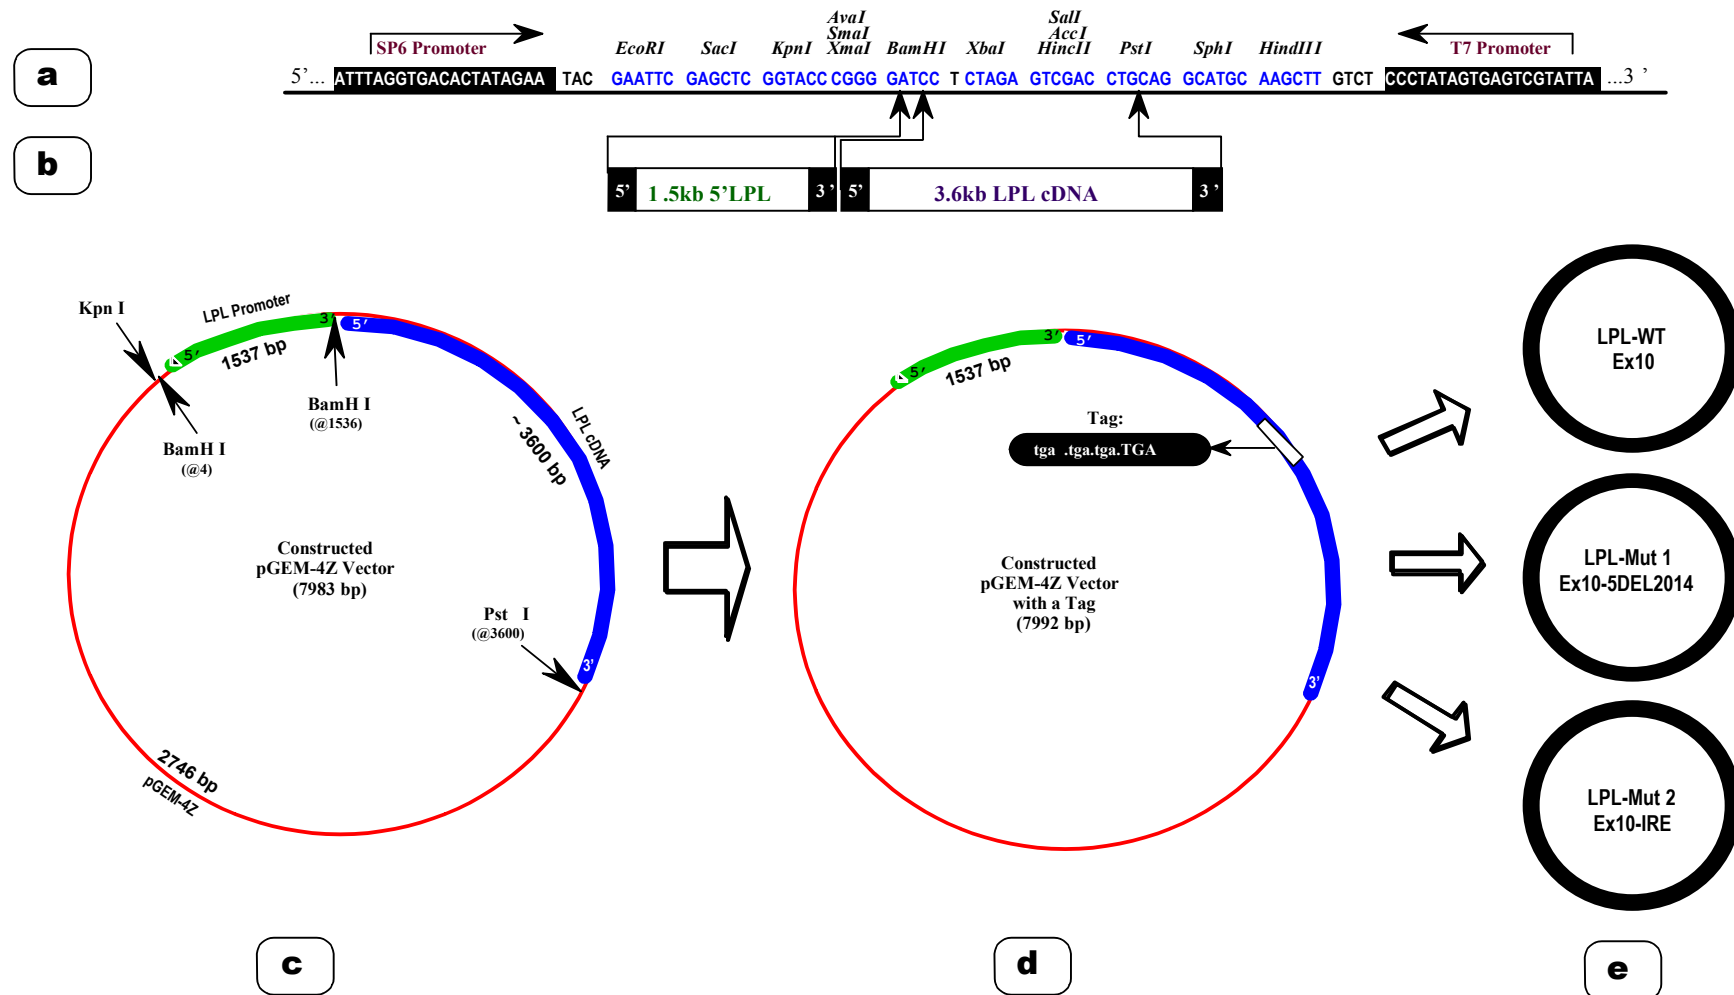

Supplementary Figure 1

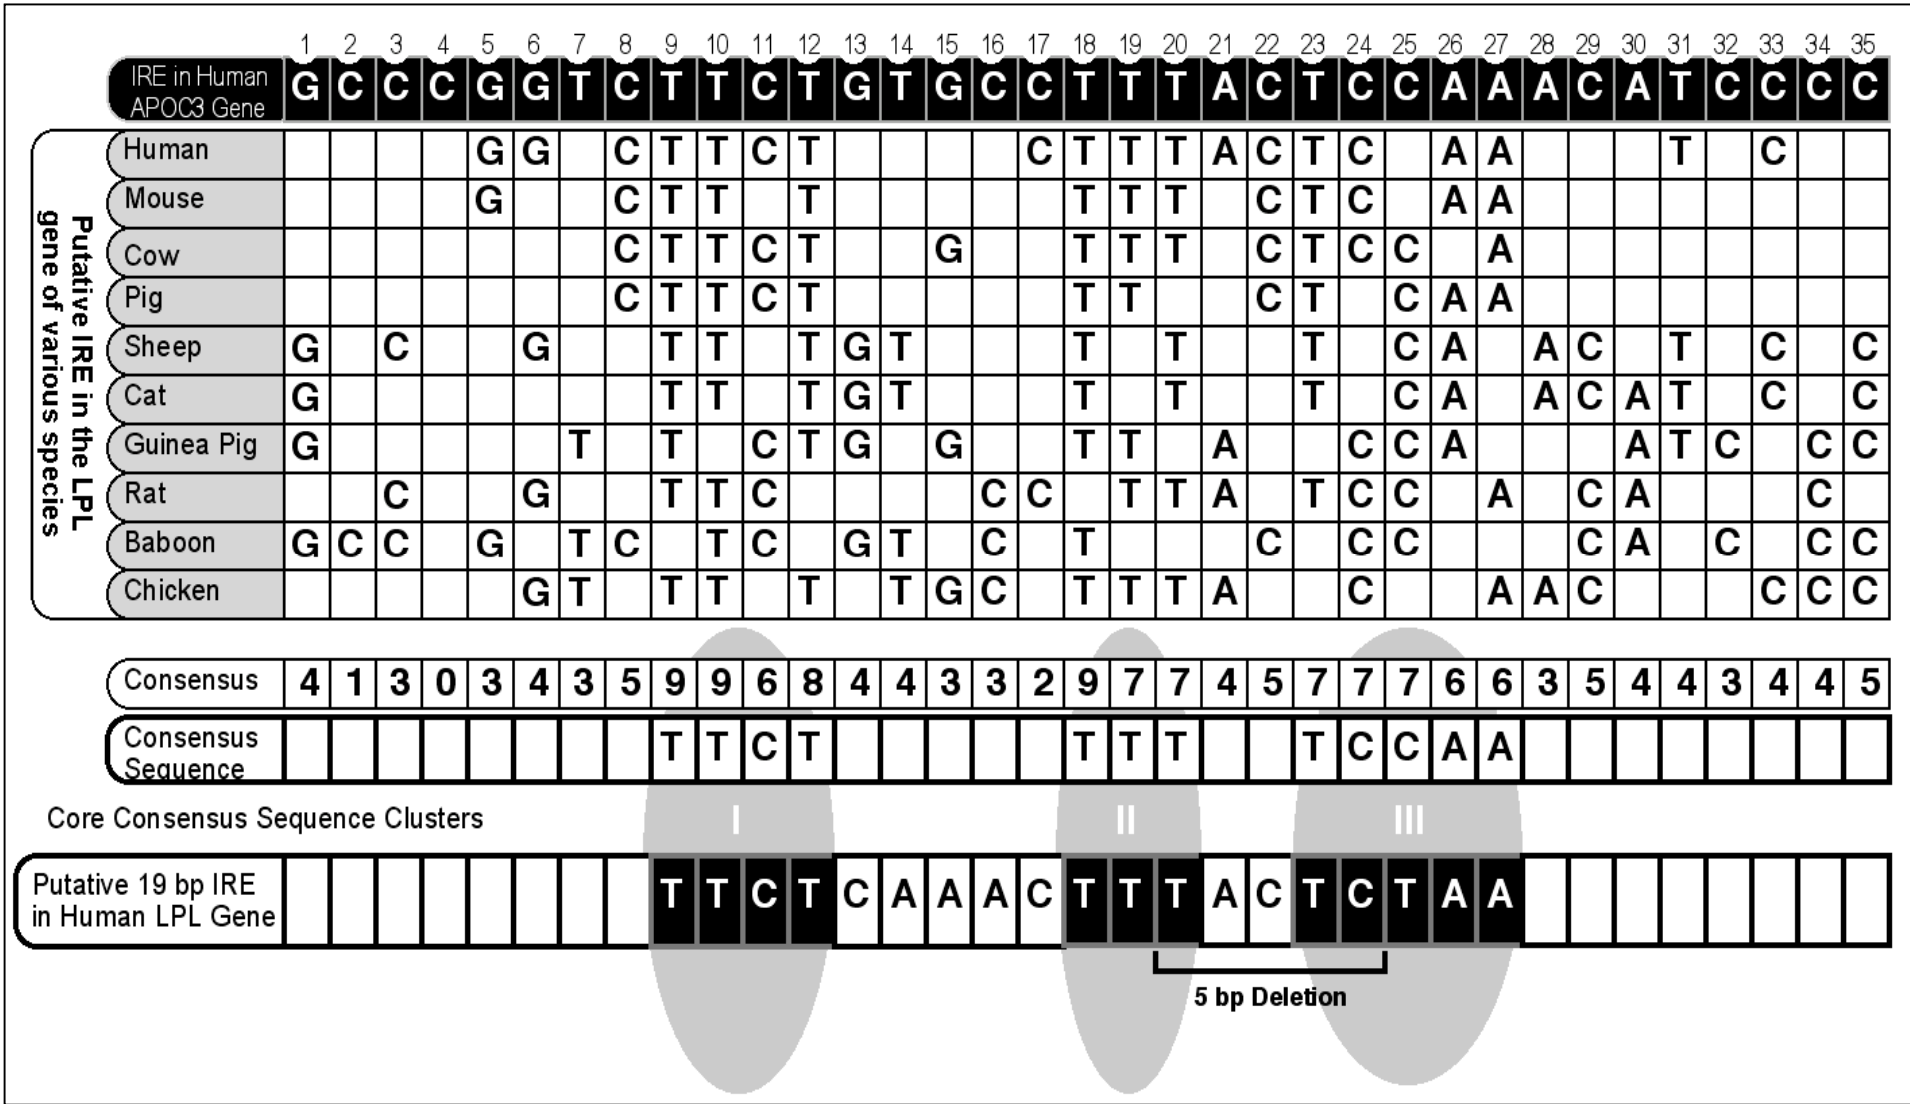

**Supplementary Figure 2**
